# Supplementary material
Source: Springer Nature journal article supplement (https://www.springermedizin.de/resource/supplementary/12879_2011_1957_MOESM1_ESM.pdf/9443434)
Supplement: MOESM1 [file 9443434]

Drug users with a diagnosis of hepatitis C

Total drug treatment population 23,657

A diagnosis of hepatitis C in source registers:

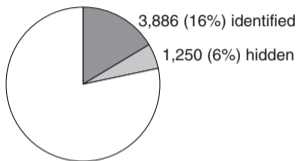

Population with a hepatitis C diagnosis = 5,136

Drug users tested for HCV

Total HCV tested population  
7,821

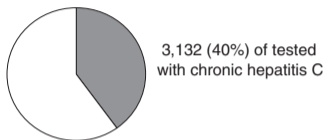

40% of all drug user in register (n =23,657)  
corresponds to 9,463 HCV infected

**54% (5,136/9,463)  
of all HCV infected drug users  
diagnosed with HCV**

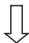

**9,166 patients diagnosed  
with hepatitis C  
in Denmark**

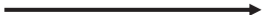

**16,888 patients infected  
with hepatitis C  
in Denmark**
